# Supplementary material for: Cavitands as superior sorbents for benzene detection at trace levelElectronic supplementary information (ESI) available: synthetic procedures for the preparation of cavitands 2, 3; 29Si and 13C CP/MAS NMR spectra of MeCav and QxCav coated silica; desorption pattern of BTX observed for Tenax TA® at 50 °C; GC traces obtained from the desorption at 75 °C of the BTX mixture trapped on AXCav trap and Carbotrap 100®. See http://www.rsc.org/suppdata/nj/b2/b210942e/
Source: Royal Society of Chemistry journal article supplement (doi:10.1039/b210942e), 2003-01-22
Supplement: b210942e.pdf [file b210942e.pdf]

**Supporting information for**

**Cavitands as superior sorbents for BTX detection at trace level**

**Federica Bianchi,<sup>†</sup> Roberta Pinalli,<sup>‡</sup> Franco Ugozzoli,<sup>†</sup> Silvia Spera,<sup>§</sup> Maria Careri,<sup>†\*</sup> and Enrico Dalcanale<sup>‡\*</sup>**

<sup>†</sup>Dipartimento di Chimica Generale ed Inorganica, Chimica Analitica, Chimica Fisica, Università degli Studi di Parma, Parco Area delle Scienze 17/A, I-43100 Parma, Italy

<sup>‡</sup>Dipartimento di Chimica Organica e Industriale and INSTM, UdR Parma, Università degli Studi di Parma, Parco Area delle Scienze 17/A, I-43100 Parma, Italy

<sup>§</sup>Dipartimento di Chimica Analitica, Istituto G. Donegani, Via Fauser 4, I-28100 Novara, Italy

**Cavitand 2.** Bromochloromethane (16.95 g, 131 mmol) and  $K_2CO_3$  (3.62 g, 26.20 mmol) were added, under argon, to a solution of resorcinarene **1** (2.73 g, 2.62 mmol) in dry DMA (100 mL) in a Schlenk reactor. The suspension was stirred at 88°C for 3 hours. The reaction was quenched in acid water, and the product was extracted with  $CH_2Cl_2$  and dried on  $Mg_2SO_4$ . After filtration the solvent was removed under pressure, and the yellow oil obtained **2** in 97% yield (2.77 g) was used without any other purification. M.p. 106-108°C;  $^1H$  NMR (300 MHz,  $CDCl_3$ ):  $\delta$  = 7.10 (s, 4H; ArH), 6.47 (s, 4H; ArH), 5.85-5.76 (m, 4H, RCH=CH<sub>2</sub>), 5.72 (d, J=7.2 Hz; 4H; CH<sub>2out</sub>), 4.93 (m, 8H, RC=CH<sub>2</sub>), 4.72 (t, J=8.0 Hz, 4H; RCHAR<sub>2</sub>), 4.41 (d, J=7.2 Hz, 4H; CH<sub>2in</sub>), 2.20 (m, 8H; RCH<sub>2</sub>CHAR<sub>2</sub>), 2.03 (m, 8H; RCH<sub>2</sub>CH=CH<sub>2</sub>), 1.29 (m, 48H; CH<sub>2</sub>);  $^{13}C$  NMR (300 MHz,  $CDCl_3$ ):  $\delta$  = 154.8 (C, resorcinarene), 139.2 (CH=CH<sub>2</sub>), 138.4 (C, resorcinarene), 120.6 (C, resorcinarene), 116.5 (C, resorcinarene), 114.2 (CH=CH<sub>2</sub>) 99.5 (OCH<sub>2</sub>O), 36.3 (CHAR<sub>2</sub>), 33.8-27.8 (CH<sub>2</sub>, chain); FT-IR (KBr): 1641, 968 (OCH<sub>2</sub>O), 908 (C=C)  $cm^{-1}$ ; MS (CI):  $m/z$  (%): 1090 (90) [MH]<sup>+</sup>. Anal. Calcd for C<sub>72</sub>H<sub>96</sub>O<sub>8</sub>: C, 79.37; H, 8.88. Found: C, 79.01; H, 9.07.

**Cavitand 3.** 2,3-dichloroquinoxaline (1.10 g, 7.97 mmol) and  $K_2CO_3$  (6.37 g, 46.09 mmol) were added, under argon, to a solution of resorcinarene **1** (2.0 g, 1.92 mmol) in dry DMA (40 mL). The suspension was stirred at 40°-50°C for about 16 hours. The reaction was quenched in water (200 mL); the resulting suspension was acidified to pH 7 and filtered. The residue was dissolved in  $CH_2Cl_2$  and the organic layer was washed with water to neutrality and evaporated under vacuum. The residue was then purified by column chromatography ( $SiO_2$ ,  $CH_2Cl_2$ /Et<sub>2</sub>O 99:1) to give cavitand **3** in 44% yield (1.32 g) as a white powder. M.p. 275-276°C;  $^1H$  NMR (300 MHz,  $CDCl_3$ ):  $\delta$  = 8.16 (s, 4H; ArH), 7.79 (m, 8H; ArH, part AA' of a AA'BB' system), 7.47 (m, 8H; ArH, part BB' of a AA'BB' system), 7.21 (s, 4H; ArH), 5.84 (m, 4H; RCH=CH<sub>2</sub>), 5.58 (t, J=7.3 Hz, 4H; RCHAR<sub>2</sub>), 4.98 (m, 8H; RCH=CH<sub>2</sub>), 2.23 (m, 8H; RCH<sub>2</sub>CHAR<sub>2</sub>), 2.05 (m, 8H; RCH<sub>2</sub>CH=CH<sub>2</sub>), 1.35 (m, 48H; CH<sub>2</sub>); FT-IR (KBr): 3072, 1640, 911 (C=C)  $cm^{-1}$ ; MS (CI):  $m/z$  (%): 1546 (100) [MH]<sup>+</sup>. Anal. Calcd for C<sub>100</sub>H<sub>104</sub>N<sub>8</sub>O<sub>8</sub>: C, 77.69; H, 6.78; N, 7.25. Found: C, 77.41; H, 6.97; N, 7.01.



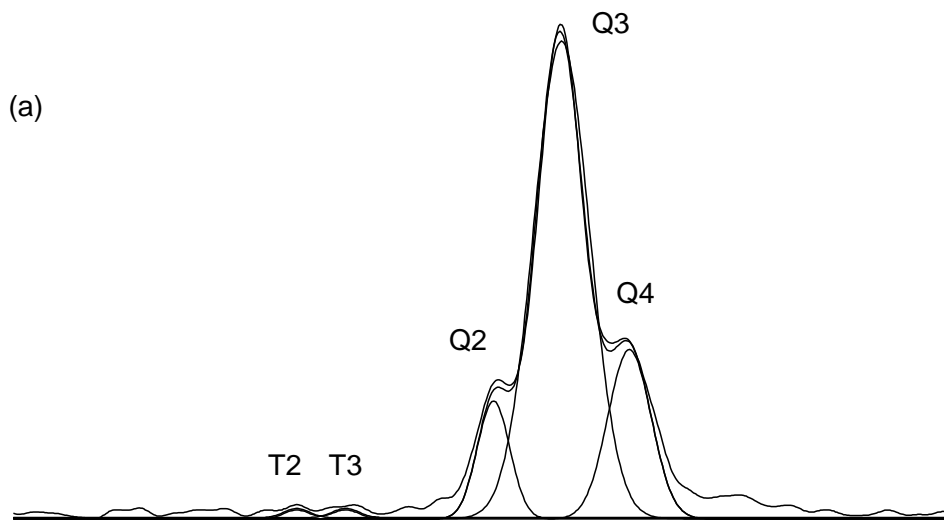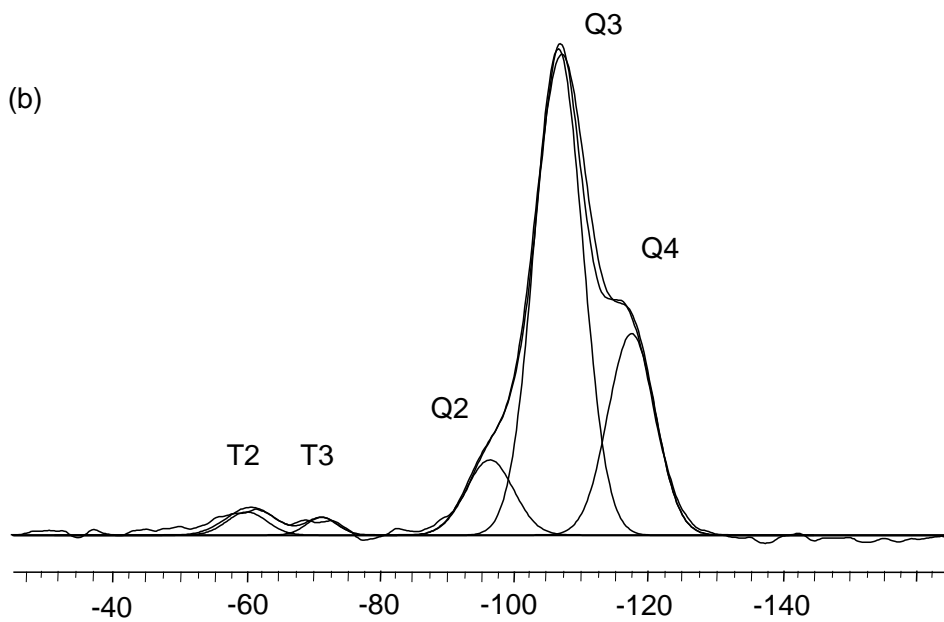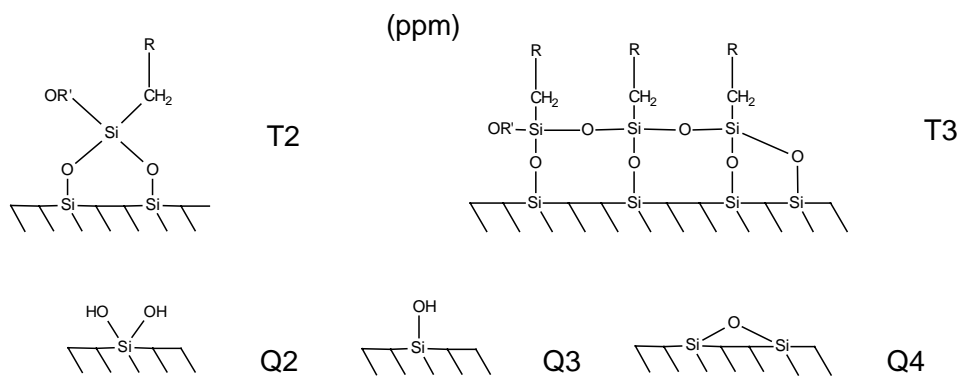

$^{29}\text{Si}$  CP/MAS NMR spectra of: (a) MeCav coated silica; (b) QxCav coated silica

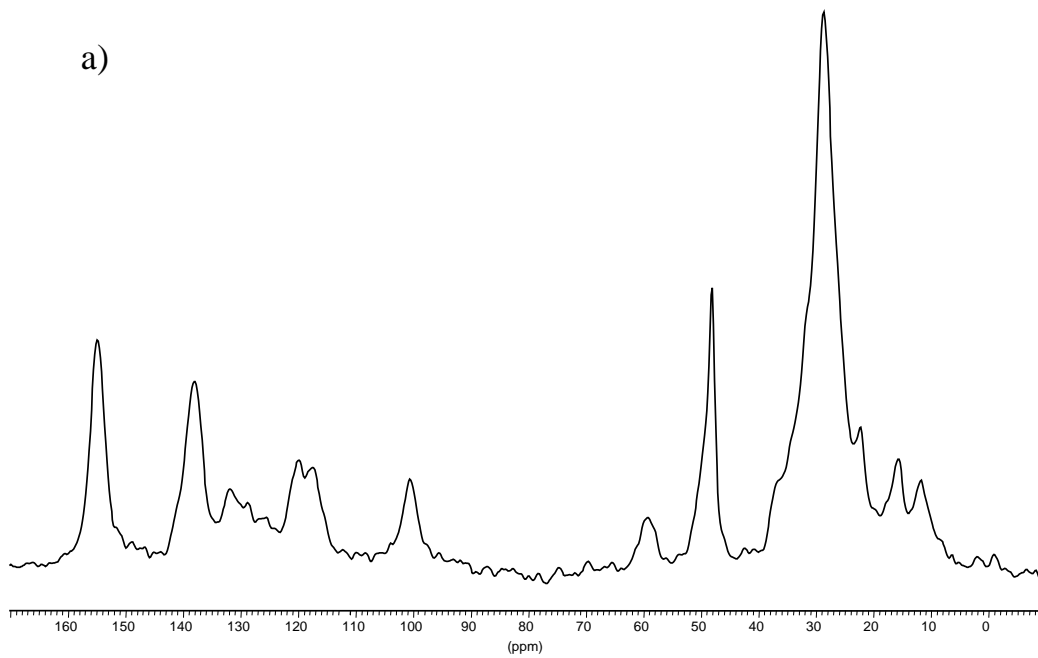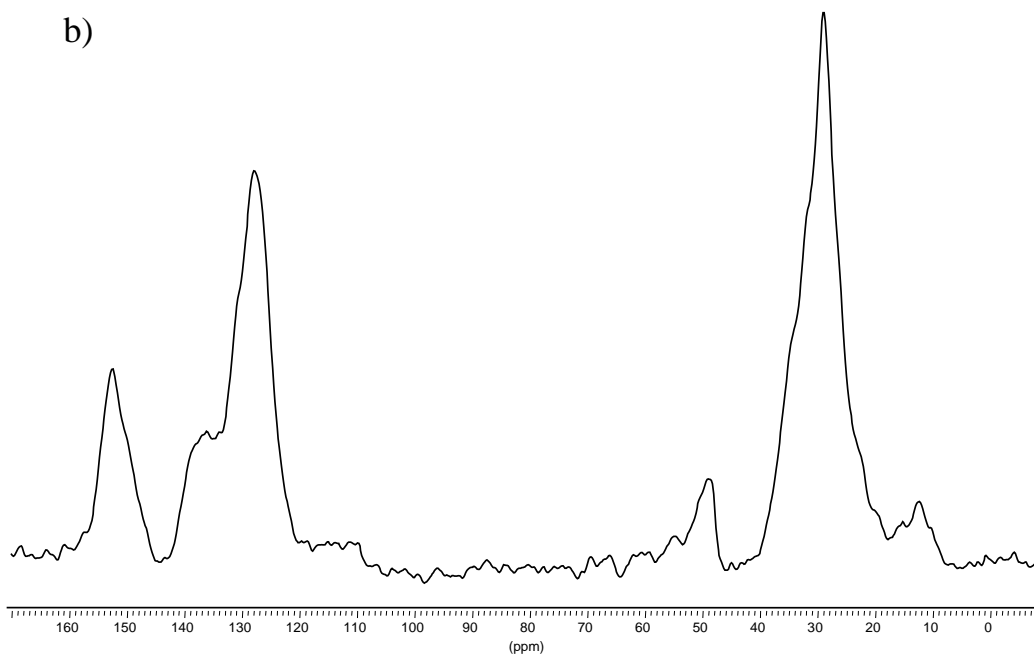

$^{13}\text{C}$  CP/MAS NMR spectra of: (a) MeCav grafted on silica; (b) QxCav grafted on silica

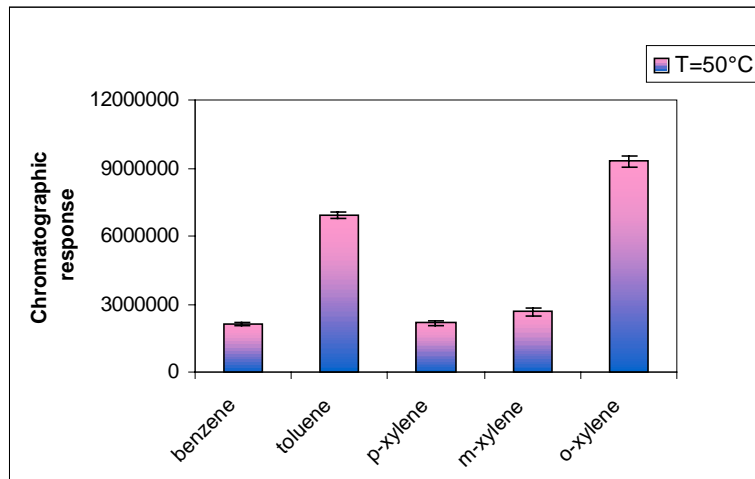

Desorption pattern of BTX observed for Tenax TA<sup>®</sup> at 50°C.

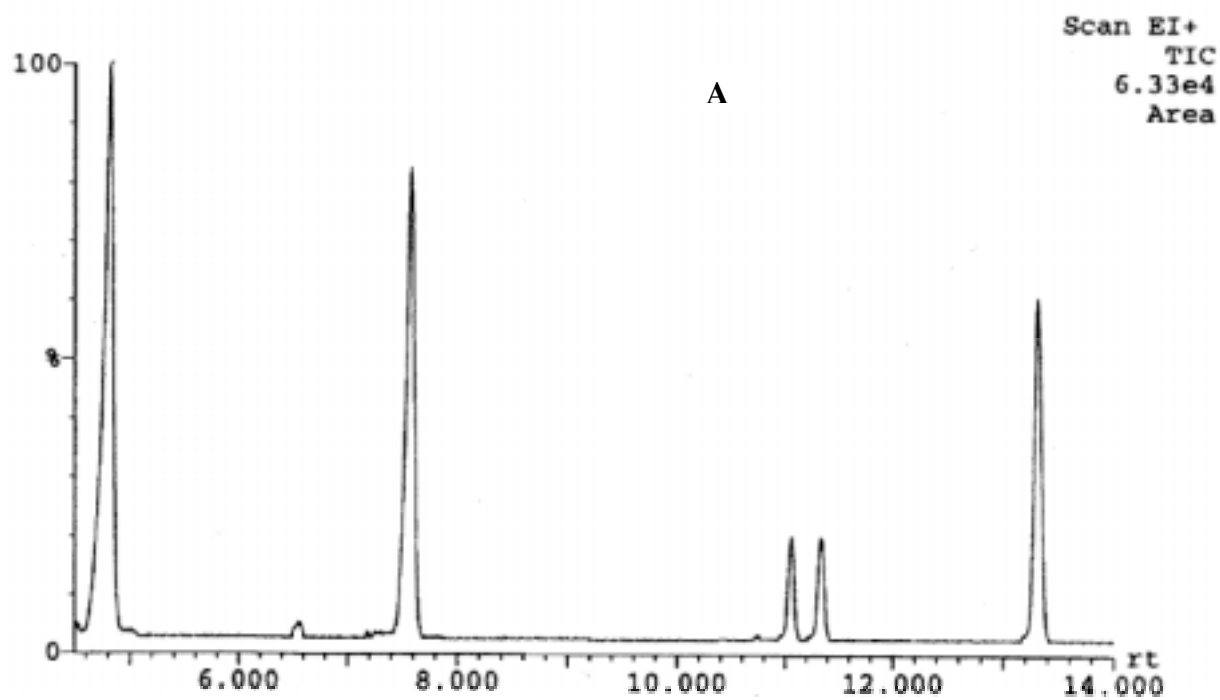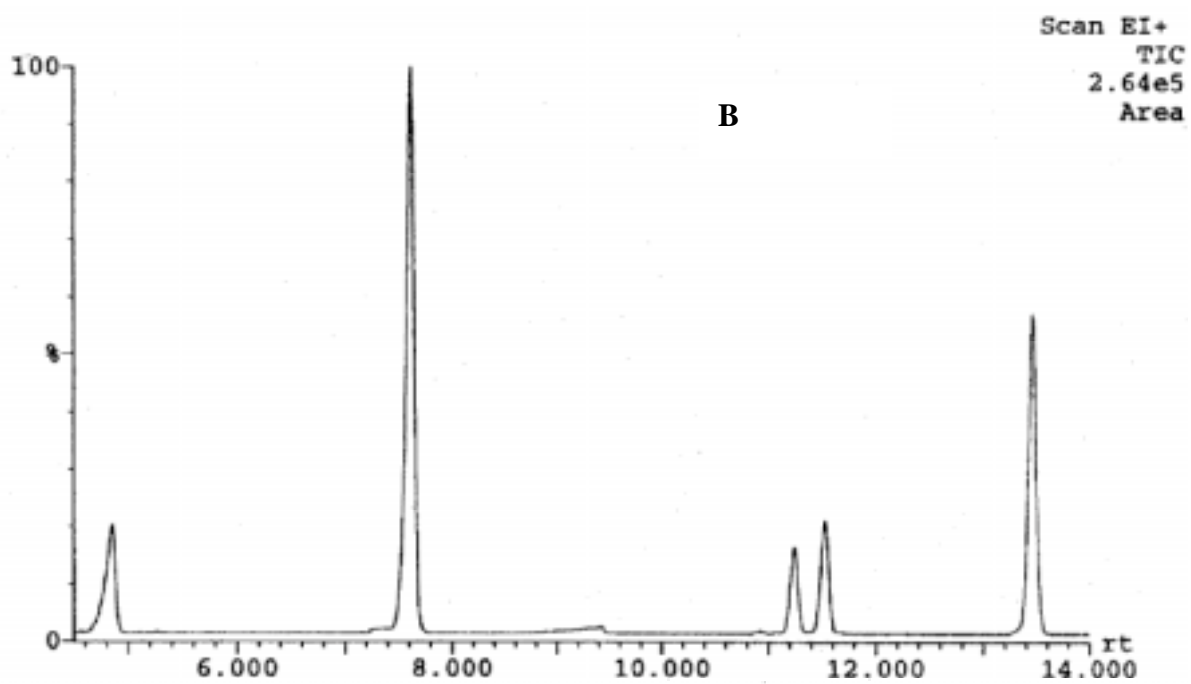

Gas chromatographic traces obtained from the desorption at 75°C of the BTX mixture trapped on:  
**A)** QxCav trap and **B)** Carbotrap 100®.
